P4781

### Comparative effectiveness and safety of factor-xa inhibitors vs phenprocoumon in patients with non-valvular atrial fibrillation and malignant diseases, insights from the RELOADED study

H. Bonnemeier<sup>1</sup>, R. Kreutz<sup>2</sup>, D. Enders<sup>3</sup>, N. Schmedt<sup>3</sup>, D. Haeckl<sup>4</sup>, T. Vaitiakhovich<sup>5</sup>, S. Kloss<sup>5</sup>

<sup>1</sup>University Medical Center of Schleswig-Holstein, Kiel, Germany; <sup>2</sup>Charite - Campus Mitte (CCM), Institute of Clinical Pharmacology and Toxicology, Berlin, Germany; <sup>3</sup>Ingef - Institute for Applied Health Research Berlin, Berlin, Germany; <sup>4</sup>WIG2 - Scientific Institute for Health Economics and Health Service Research, Leipzig, Germany; <sup>5</sup>Bayer AG, Real World Evidence and Outcomes Data Generation, Berlin, Germany

**Funding Acknowledgement:** The study was funded by Bayer AG

**Background:** Data on safety and effectiveness of Factor-Xa inhibitors and phenprocoumon in patients with non-valvular atrial fibrillation (NVAF) and malignant diseases is scarce. Among others, our study aimed to investigate the safety and effectiveness in new users of Factor-Xa inhibitors vs. phenprocoumon, the vitamin-K antagonist (VKA) of choice in Germany.

**Methods:** We conducted a new user cohort study (one year washout period) in patients with NVAF and malignant diseases. German claims data between January 1st, 2013 and June 30th, 2017 were utilized and a multiple Cox-regression was performed to calculate confounder-adjusted hazard ratios (HRs) for the risk of ischemic stroke (IS)/systemic embolism (SE), intracranial haemorrhage (ICH) as well as renal function worsening, defined by end stage renal disease (ESRD) or dialysis and acute kidney injury (AKI) in Factor-Xa inhibitors and phenprocoumon initiators. Diagnoses of malignant diseases were assessed over the one-year baseline period.

**Results:** The population comprised 3,779 phenprocoumon initiators, 3,386 rivaroxaban initiators, 2,697 apixaban initiators and 434 edoxaban initiators. In the confounder-adjusted analysis, no difference related to the risk of IS/SE was found for rivaroxaban and edoxaban vs. phenprocoumon,

where apixaban showed a numerically increased risk for stroke (figure 1). Point estimates related to the risk of ICH showed the expected beneficial effects for both, rivaroxaban and apixaban. A strong beneficial effect was observed for rivaroxaban when assessing the risk of renal function worsening. Hazard ratios related to the risk of ESRD/dialysis and AKI were 0.27 (0.10; 0.69) and 0.64 (0.38; 1.06), respectively. For apixaban, only the ESRD/dialysis showed a reduction in risk when compared to phenprocoumon, HR 0.42 (0.19; 0.94).

**Conclusion:** This retrospective database study conducted in Germany adds evidence on the effectiveness and safety profile of Factor-Xa inhibitors over VKA in patients with NVAF and malignant diseases, a critical subgroup of patients where anticoagulation is challenging. However, apixaban showed a numerically increased risk for IS/SE compared to phenprocoumon. Both, rivaroxaban and apixaban showed a risk reduction for renal function worsening within the study period of 63% and 48%, respectively compared to phenprocoumon. Only rivaroxaban showed a risk reduction of 36% for AKI.

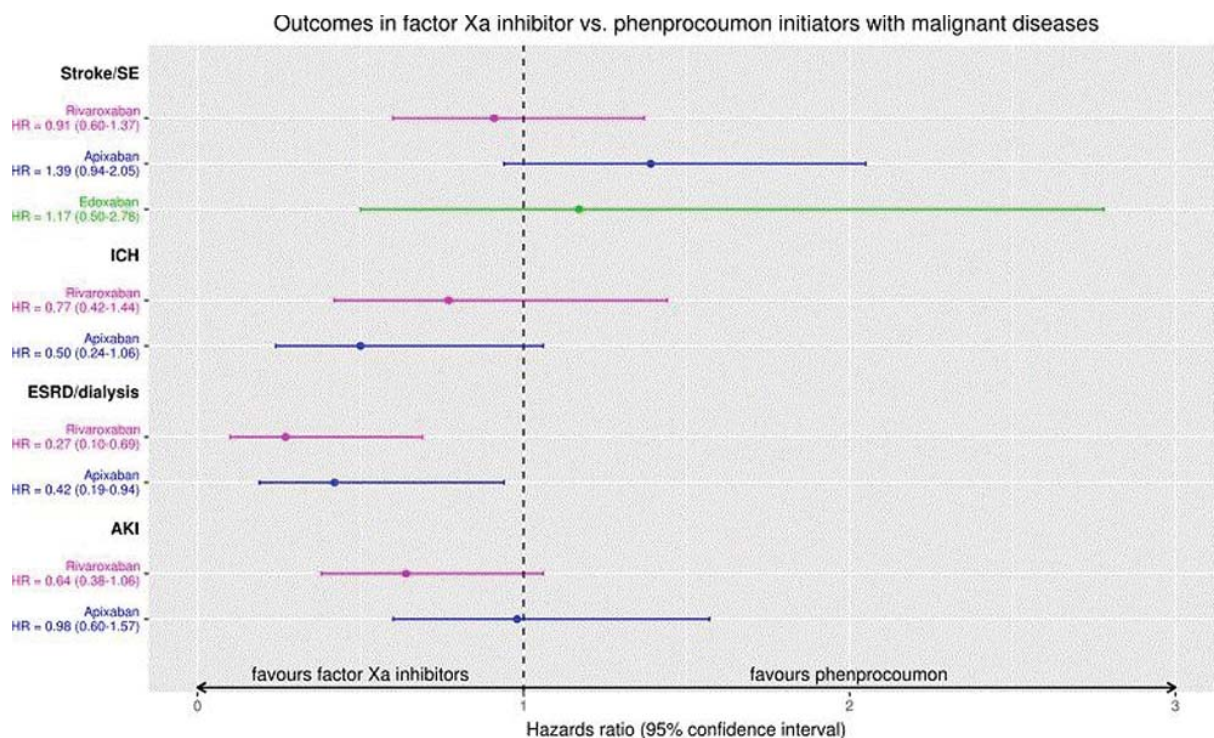

Source: http://academic.oup.com/eurheartj/article-pdf/40/Supplement_1/ehz745.1157/30203932/ehz745.1157.pdf
